# Supplementary material
Source: Springer Nature journal article supplement (https://www.springermedizin.de/resource/supplementary/12916_2013_909_MOESM9_ESM.pdf/9598808)

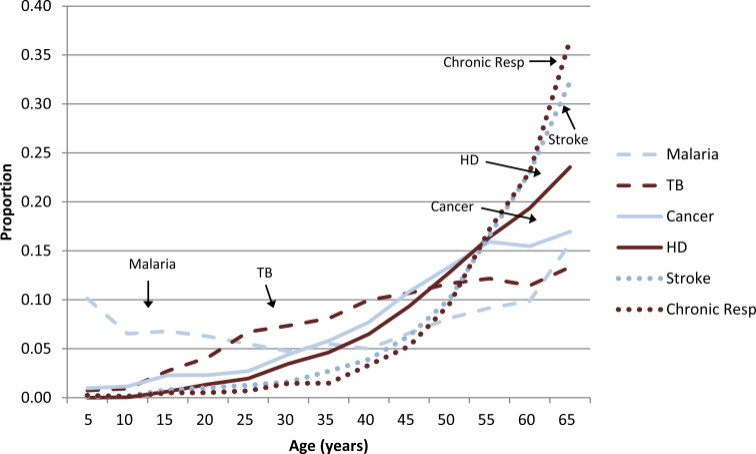

Supplement: MOESM9 [file 9598808]
